# Supplementary material for: Living syndiospecific polymerization of propylene with sterically encumbered titanium complexes activated by MMAO
Source: Royal Society of Chemistry journal article supplement (doi:10.1039/c4py00813h), 2014-01-01
Supplement: c4py00813h1.pdf [file c4py00813h1.pdf]

## Supporting information

### Living Syndiospecific Polymerization of Propylene with Sterically Encumbered Titanium Complexes activated by MMAO

Ying-Yun Long,<sup>a</sup> Yong-Xia Wang,<sup>a</sup> Bai-Xiang Li,<sup>a</sup> Yan-Guo Li,<sup>a</sup> Yue-Sheng Li<sup>\*ab</sup>

<sup>a</sup> State Key Laboratory of Polymer Physics and Chemistry, Changchun Institute of Applied Chemistry, Chinese Academy of Sciences, Changchun 130022, China, E-mail: ysli@ciac.jl.cn

<sup>b</sup> School of Material Science and Engineering, Tianjin University, Tianjin 300072, China

#### Contents

- (1) **Table S1.** Propylene polymerization results
- (2) **Figure S1.** The aliphatic region of <sup>13</sup>C NMR spectra for low molecular weight syndiotactic polypropylene obtained by **1e**/MMAO systems (10 μmol catalyst, polymerization time 20 min, polymerization temperature 0 °C,  $M_n = 9.0$  kg/mol,  $M_w/M_n = 1.09$ ).
- (3) **Figure S2.** Calculated structures of propylene 1,2-inserted species of **1a** and **1e** in propylene polymerization activated by MMAO with free TMA. The groups R<sub>1</sub>-R<sub>3</sub> are omitted. The red, blue, yellow and pink atoms represent oxygen, nitrogen, titanium and aluminum atoms, respectively.
- (4) **Figure S3.** The calculated structures of complex **1e**. The red, navy blue, blue, cambridge blue, green and yellow atoms represent oxygen, nitrogen, bromine, fluorine, chlorine and titanium atoms, respectively.
- (5) **Figure S4.** Plots of  $M_n$  and  $M_w/M_n$  vs reaction time for propylene polymerization with catalyst **1b** (10 μmol, using dried MAO as co-catalyst, Al/Ti = 500, polymerization at 0 °C, propylene pressure 6 bar).
- (6) **Figure S5** The aliphatic region of <sup>13</sup>C NMR spectra for syndiotactic poly(propylene) obtained by **1a** (entry 6, **Table 2**), **1b** (entry 9), **1d** (entry 13) and **1e** (entry 3) combined with MMAO at 0 °C, respectively.
- (7) **Figure S6** <sup>13</sup>C NMR spectra of the methyl region for syndiotactic poly(propylene) obtained

by **1e** at -10°C (a), 10°C (b), 25°C (c) combined with MMAO at 0 °C, respectively.

(8) **Figure S7** <sup>13</sup>C NMR spectra of the methyl region for syndiotactic poly(propylene) obtained by **1e** at 40°C (d), 55°C (e) and **1a** at 40°C (f) and 55°C (g) combined with MMAO at 0 °C, respectively.

(9) **Figure S8** DSC curves of syndiotactic PPs at a heating rate of 10°C/min: (a) **1b**/MMAO catalyst system,  $T_m = 139.3$  °C, 135.2 °C; (b) **1d**/MMAO catalyst system,  $T_m = 136.5$  °C, 122.6 °C; (c) **1e**/MMAO catalyst system,  $T_m = 150.9$  °C, 138.0 °C.

**Table S1** Propylene polymerization results<sup>a</sup>

| Entry | Cat.      | Time (h) | Yield (g) | Activity <sup>b</sup> | $M_w^c$ | $M_w/M_n^c$ | $N(\mu\text{mol})^d$ | $T_m^e(^\circ\text{C})$ |
|-------|-----------|----------|-----------|-----------------------|---------|-------------|----------------------|-------------------------|
| 1     | <b>1a</b> | 2.0      | 0.92      | 46.0                  | 158.9   | 1.22        | 7.06                 | 146.2, 133.4            |
| 2     | <b>1b</b> | 2.0      | 1.10      | 55.0                  | 170.2   | 1.23        | 7.93                 | 137.3, 126.2            |
| 3     | <b>1c</b> | 2.0      | 0.88      | 44.0                  | 138.5   | 1.25        | 7.94                 | 137.2, 119.0            |
| 4     | <b>1d</b> | 2.0      | 0.80      | 40.0                  | 137.0   | 1.23        | 7.18                 | 138.5, 120.6            |
| 5     | <b>1b</b> | 0.5      | 0.29      | 58.0                  | 45.5    | 1.19        | 7.58                 | 135.9, 128.0            |
| 7     | <b>1b</b> | 1.0      | 0.55      | 55.0                  | 90.2    | 1.20        | 7.32                 | 136.3, 128.5            |
| 8     | <b>1b</b> | 3.0      | 1.36      | 52.0                  | 240.5   | 1.29        | 7.29                 | 138.4, 130.8            |
| 9     | <b>1c</b> | 0.5      | 0.23      | 46.0                  | 43.0    | 1.20        | 6.48                 | 136.8, 115.5            |
| 10    | <b>1c</b> | 3.0      | 1.14      | 38.0                  | 245.3   | 1.27        | 5.92                 | 138.3, 131.8            |
| 13    | <b>1d</b> | 0.5      | 0.20      | 40.0                  | 38.5    | 1.18        | 6.12                 | 134.3, 112.3            |
| 14    | <b>1d</b> | 3.0      | 1.11      | 37.0                  | 235.0   | 1.25        | 5.90                 | 137.0, 120.0            |

<sup>a</sup> Polymerization conditions: 10  $\mu\text{mol}$  catalyst, solvent 50 mL toluene, propylene pressure 6 bar; dMAO used as a cocatalyst, polymerization temperature 0°C. <sup>b</sup> Activity (kg/mol·h). <sup>c</sup> Determined by GPC data in 1,2,4-trichlorobenzene versus polystyrene standard. The unit of molecular weight is kg/mol. <sup>d</sup> Calculated from yield and  $M_n$ . <sup>e</sup> Determined by DSC at a heating rate of 10°C/min.

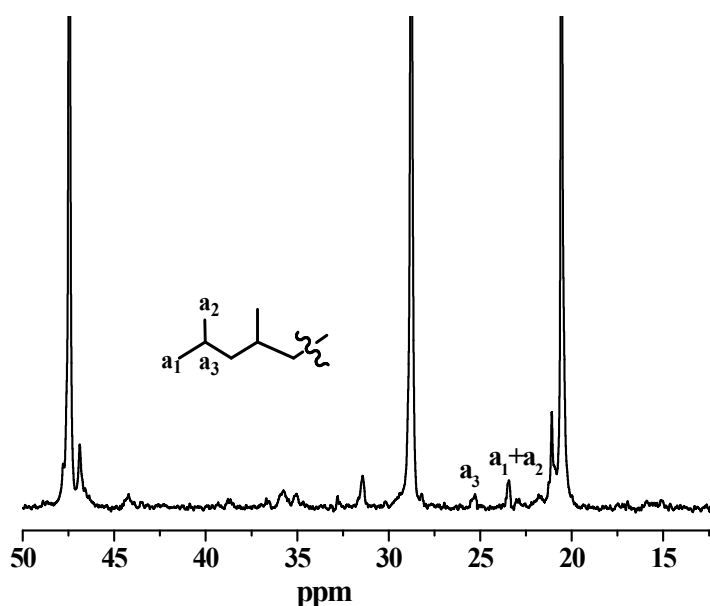

**Figure S1.** The aliphatic region of  $^{13}\text{C}$  NMR spectra for low molecular weight syndiotactic polypropylene obtained by **1e**/MMAO systems (10  $\mu\text{mol}$  catalyst, polymerization time 20 min, polymerization temperature  $0^\circ\text{C}$ ,  $M_n = 9.0$  kg/mol,  $M_w/M_n = 1.09$ ). The peaks at 23.3-23.6 ppm and 25.6 ppm are assigned to the methyl and methine carbons of isobutyl chain-end groups, respectively. No peaks assignable to other possible chain-end groups, namely ethyl, *n*-propyl, *n*-butyl, isopropyl, *sec*-butyl and isopentyl, were observed in the  $^{13}\text{C}$  NMR spectrum. These results confirmed that the polymerization proceeded via 1,2-insertion of monomer.

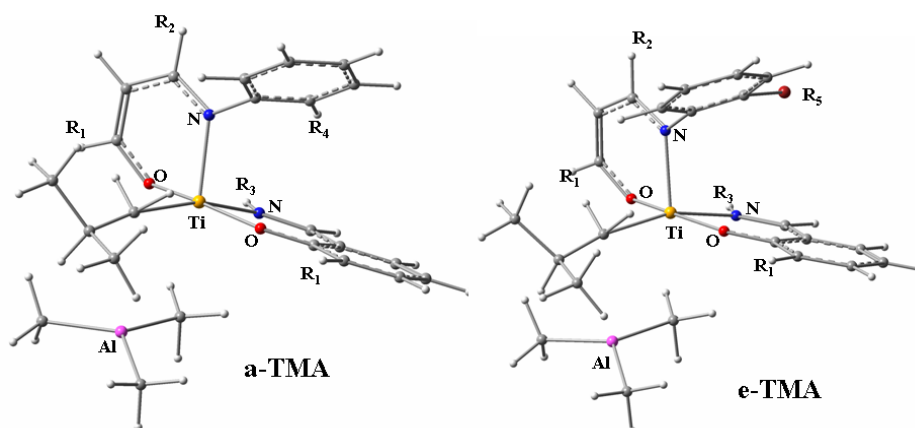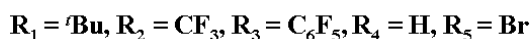

**Figure S2.** Calculated structures of propylene 1,2-inserted species of **1a** and **1e** in propylene polymerization activated by MMAO with free TMA. The groups  $\text{R}_1$ - $\text{R}_3$  are omitted. The red, blue, yellow and pink atoms represent oxygen, nitrogen, titanium and aluminum atoms, respectively.

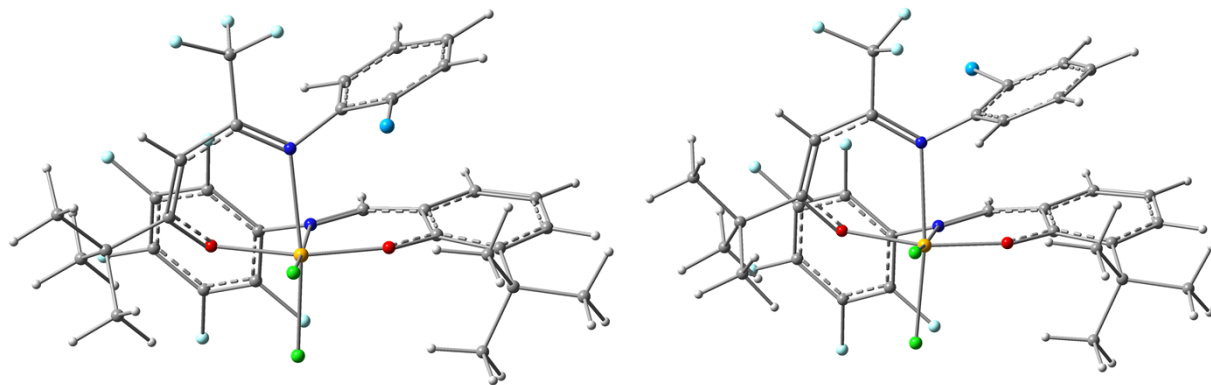

**Figure S3.** The calculated structures of complex **1e**. The red, navy blue, blue, cambridge blue, green and yellow atoms represent oxygen, nitrogen, bromine, fluorine, chlorine and titanium atoms, respectively.

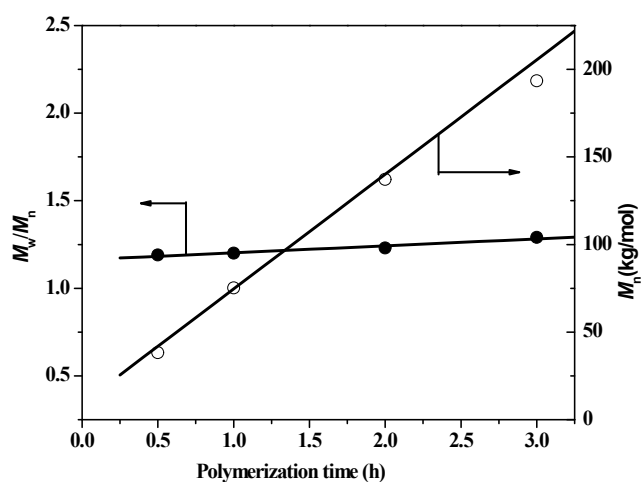

**Figure S4.** Plots of  $M_n$  and  $M_w/M_n$  vs reaction time for propylene polymerization with catalyst **1b** (20  $\mu\text{mol}$ , using dried MAO as co-catalyst, Al/Ti = 500, polymerization at 0°C, propylene pressure 6 bar).

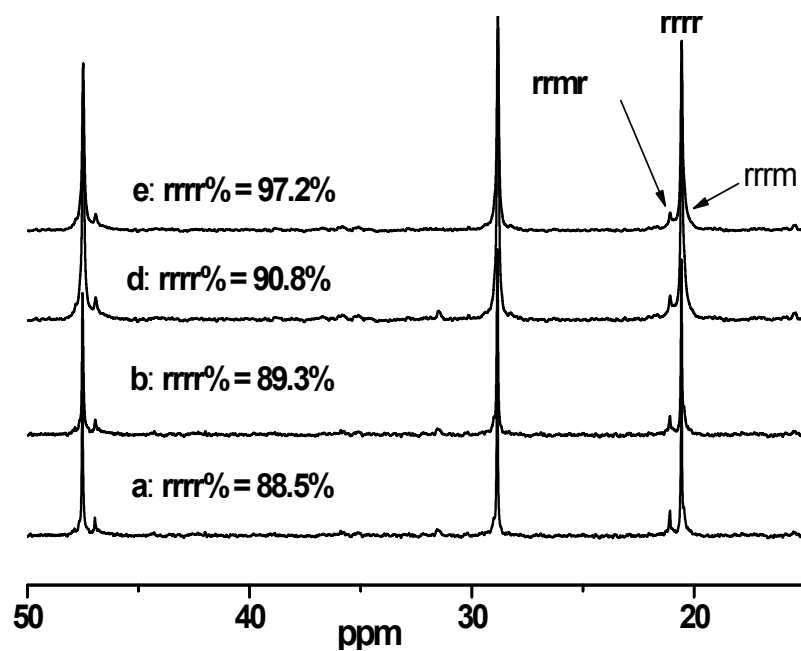

**Figure S5.** The aliphatic region of  $^{13}\text{C}$  NMR spectra for syndiotactic poly(propylene) obtained by **1a** (entry 6, **Table 2**), **1b** (entry 9), **1d** (entry 13) and **1e** (entry 3) combined with MMAO at  $0\text{ }^{\circ}\text{C}$ , respectively.

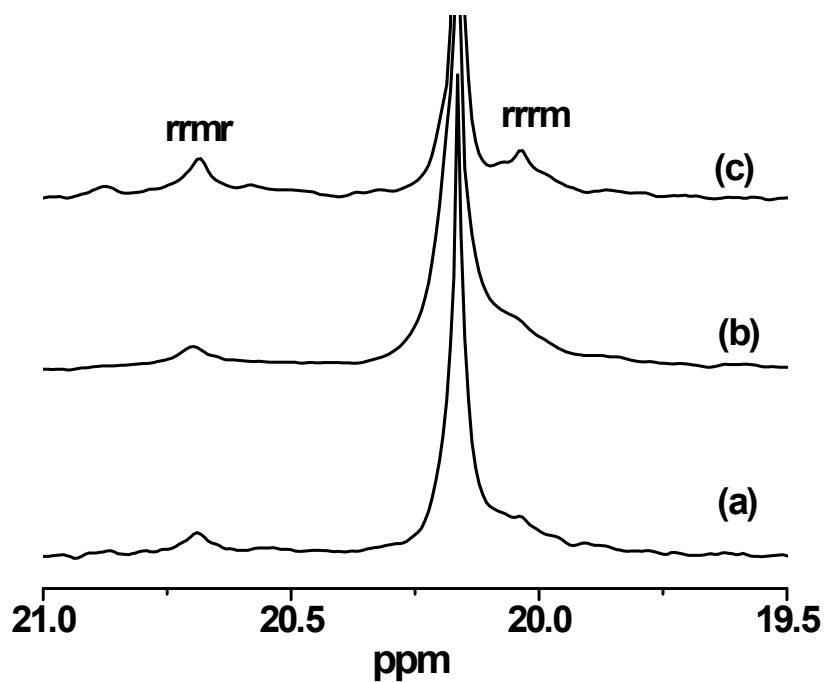

**Figure S6**  $^{13}\text{C}$  NMR spectra of the methyl region for syndiotactic polypropylenes obtained by **1e** at  $-10^{\circ}\text{C}$  (a),  $10^{\circ}\text{C}$  (b),  $25^{\circ}\text{C}$  (c) combined with MMAO at  $0\text{ }^{\circ}\text{C}$ , respectively.

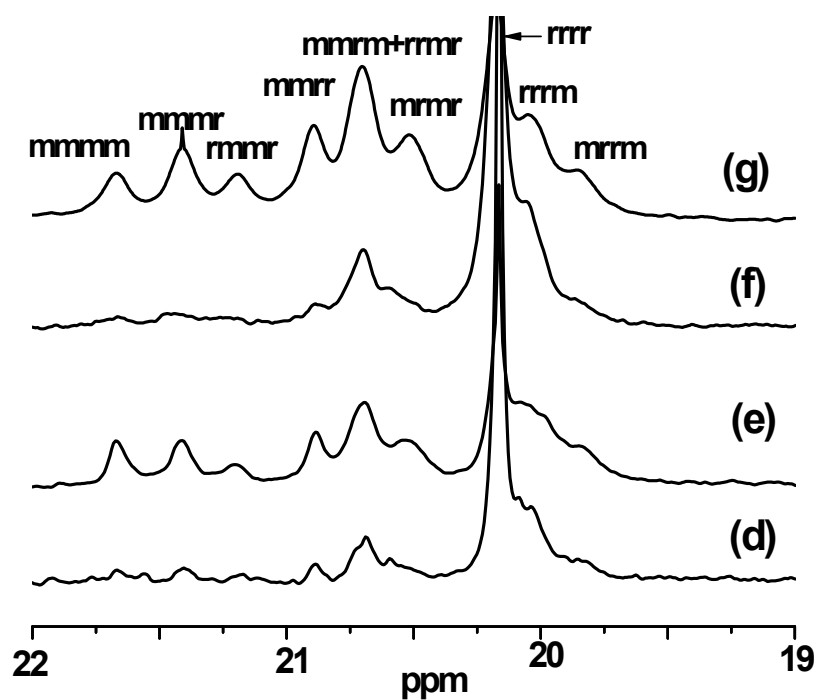

**Figure S7**  $^{13}\text{C}$  NMR spectra of the methyl region for syndiotactic polypropylenes obtained by **1e** at 40°C (d), 55°C (e) and **1a** at 40°C (f) and 55°C (g) combined with MMAO at 0 °C, respectively.

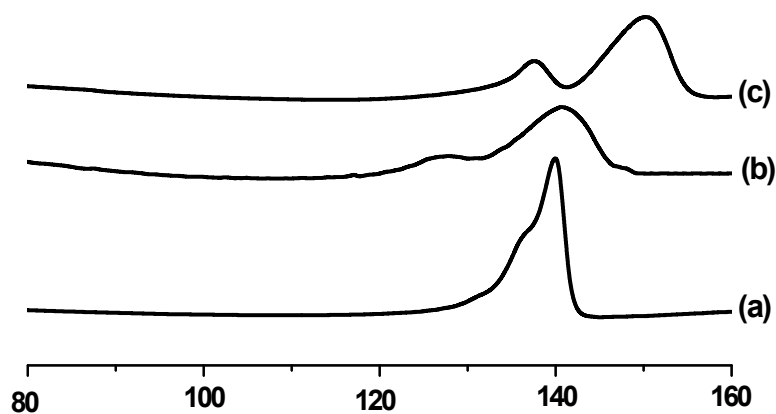

**Figure S8.** DSC curves of syndiotactic PPs at a heating rate of 10°C/min: (a) **1b**/MMAO catalyst system,  $T_m = 139.3$  °C, 135.2 °C (entry 8, Table 2); (b) **1d**/MMAO catalyst system,  $T_m = 140.5$  °C, 126.6 °C (entry 12, Table 2); (c) **1e**/MMAO catalyst system,  $T_m = 150.9$  °C, 138.0 °C (entry 4, Table 2).
